# Supplementary material for: A Culturally Tailored Community Health Worker Intervention Leads to Improvement in Patient-Centered Outcomes for Immigrant Patients With Type 2 Diabetes
Source: Oxford University Press journal article supplement (doi:10.2337/cd17-0068), 2018-02-01
Supplement: cd170068supplementarydata.pdf [file cd170068supplementarydata.pdf]

# A Culturally Tailored Community Health Worker Intervention Leads to Improvement in Patient-Centered Outcomes for Immigrant Patients With Type 2 Diabetes

Nadia S. Islam, Laura C. Wyatt, MD Taher, Lindsey Riley, S. Darius Tandon, Michael Tanner, B. Runi Mukherji, and Chau Trinh-Shevrin  
DOI: <https://doi.org/10.2337/cd17-0068>. Published 31 January 2018

## **Supplementary Data**

### **Files in this Data Supplement:**

Supplementary Table

**TABLE S1. Patient Assessment Questionnaire**

| Question                                                                                                                                  | Responses                                                                                                                                        |
|-------------------------------------------------------------------------------------------------------------------------------------------|--------------------------------------------------------------------------------------------------------------------------------------------------|
| <b>Diabetes Knowledge</b>                                                                                                                 |                                                                                                                                                  |
| Do you know what Hemoglobin A1c is?                                                                                                       | Yes; No; Don't know                                                                                                                              |
| Hemoglobin A1c is a test that is a measure of your average blood sugar level for the past:                                                | Days; Weeks; 3 Months; 6 Months; Don't know                                                                                                      |
| What effect does an unsweetened fruit juice have on blood glucose?                                                                        | Lowers it; Raises it; Has no effect; Don't know                                                                                                  |
| For a person in good diabetes control, what effect does exercise have on blood glucose?                                                   | Lowers it; Raises it; Has no effect; Don't know                                                                                                  |
| Infection is likely to cause                                                                                                              | An increase in blood glucose; a decrease in blood glucose; No change in blood glucose; Don't know                                                |
| The best way to take care of your feet is to:                                                                                             | Look at them and wash them each day; Massage them with alcohol each day; Soak them for an hour each day; Buy shoes larger than usual; Don't know |
| Eating foods lower in fat decreases your risk for:                                                                                        | Vision problems; Kidney problems; Nerve problems; Lung problems; Don't know                                                                      |
| Numbness and tingling may be symptoms of:                                                                                                 | Kidney disease; Nerve disease; Liver disease; Eye disease; Don't know                                                                            |
| Signs of high blood sugar include:                                                                                                        | Shakiness; Very thirsty; Sweating; Don't know                                                                                                    |
| If you are sick with the flu, which of the following changes should you make?                                                             | Take less insulin; Drink less liquid; Eat more proteins; Test for glucose; Don't know                                                            |
| <b>Physical Activity</b>                                                                                                                  |                                                                                                                                                  |
| During the last 7 days, on how many days did you do large effort physical activities that made your heart rate and breathing much faster? |                                                                                                                                                  |
| How much time did you usually spend doing these hard types of physical activities on those days?                                          |                                                                                                                                                  |
| During the last 7 days, on how many days did you do moderate physical activities?                                                         |                                                                                                                                                  |
| How much time did you usually spend doing these moderate types of physical activities on a normal day that you do activity?               |                                                                                                                                                  |
| <i>How much confidence do you have:</i>                                                                                                   |                                                                                                                                                  |
| Knowing what exercises are healthy for you?                                                                                               | No confidence; Very little confidence; Moderate confidence; A lot of confidence                                                                  |
| Exercising for at least thirty minutes five times each week in the future?                                                                | No confidence; Very little confidence; Moderate confidence; A lot of confidence                                                                  |

*For each of the questions, below indicate your agreement with the statement:*

|                                                     |                 |
|-----------------------------------------------------|-----------------|
| I don't have enough time to exercise.               | Agree; Disagree |
| I am not motivated to exercise.                     | Agree; Disagree |
| I don't have a safe place to exercise.              | Agree; Disagree |
| Health problems prevent me from exercising.         | Agree; Disagree |
| I need someone to exercise with but don't have one. | Agree; Disagree |

**Diet**

*How often do you: (portion control)*

|                                                       |                                                                  |
|-------------------------------------------------------|------------------------------------------------------------------|
| Refuse offers of food when you're not hungry?         | Almost never or never; Sometimes; Often; Almost always or always |
| Try to limit the number of food servings you ate?     | Almost never or never; Sometimes; Often; Almost always or always |
| Try to limit the size of food servings you ate?       | Almost never or never; Sometimes; Often; Almost always or always |
| Try to find something else to do instead of snacking? | Almost never or never; Sometimes; Often; Almost always or always |

*Are you confident that you can? (confidence)*

|                                                                     |         |
|---------------------------------------------------------------------|---------|
| ...stay on a healthy diet.                                          | Yes; No |
| ...can cook a healthy diet.                                         | Yes; No |
| ...decrease the amount of sugar and sweets you eat.                 | Yes; No |
| ...decrease the amount of fat and cholesterol in the foods you eat. | Yes; No |

*Do you agree with the following statements? (barriers)*

|                                                                                                   |                 |
|---------------------------------------------------------------------------------------------------|-----------------|
| It is difficult for me to choose a healthy snack                                                  | Disagree; Agree |
| I cannot afford to buy healthier foods                                                            | Disagree; Agree |
| I do not have the time to prepare healthier foods                                                 | Disagree; Agree |
| There is no store for me to buy healthy foods                                                     | Disagree; Agree |
| It is uncomfortable for me to refuse unhealthy foods when they are offered to me at get-togethers | Disagree; Agree |
| I do not like how healthier foods taste                                                           | Disagree; Agree |
| I do not cook healthier foods because my family does not like them                                | Disagree; Agree |

**Self-management**

*Medication adherence*

|                                                                                                                        |         |
|------------------------------------------------------------------------------------------------------------------------|---------|
| Do you sometimes forget to take your medications?                                                                      | Yes; No |
| People sometimes miss taking their medications for reasons other than forgetting. Thinking over the past 2 weeks, were | Yes; No |

|                                                                                                                                                                                           |                                                                                             |
|-------------------------------------------------------------------------------------------------------------------------------------------------------------------------------------------|---------------------------------------------------------------------------------------------|
| there any days when you did not take your medication?                                                                                                                                     |                                                                                             |
| Have you ever cut back or stopped taking your medication without telling your doctor because you felt worse when you took it?                                                             | Yes; No                                                                                     |
| When you travel or leave home, do you sometimes forget to bring along your medications?                                                                                                   | Yes; No                                                                                     |
| Did you take your medications yesterday?                                                                                                                                                  | Yes; No (backcoded)                                                                         |
| When you feel like your diabetes symptoms are under control, do you sometimes stop taking your medications?                                                                               | Yes; No                                                                                     |
| Taking medication every day is a real inconvenience for some people. Do you ever feel hassled about sticking to your diabetes management plan?                                            | Yes; No                                                                                     |
| How often do you have difficulty remembering to take all your medications?                                                                                                                | Never; Rarely; Once in a while; Sometimes; Usually; Always                                  |
| How often do you check your blood sugar?                                                                                                                                                  | Daily; Weekly; Monthly; Every six months; When I feel sick; Never                           |
| About how often do you check your feet for sores or irritations? Include times when checked by a family member or friend, but do NOT include times when checked by a health professional. |                                                                                             |
| <i>How do you manage your diabetes?</i>                                                                                                                                                   |                                                                                             |
| Diet control                                                                                                                                                                              | Yes; No                                                                                     |
| Physical activity                                                                                                                                                                         | Yes; No                                                                                     |
| <i>Self-efficacy</i>                                                                                                                                                                      |                                                                                             |
| How often do you have to make your own health related decisions?                                                                                                                          | None of the time; A little of the time; Some of the time; Most of the time; All of the time |
| Do you feel comfortable asking your doctor about questions or health issues you don't understand or know?                                                                                 | None of the time; A little of the time; Some of the time; Most of the time; All of the time |
| Do you feel comfortable going to the doctor alone?                                                                                                                                        | None of the time; A little of the time; Some of the time; Most of the time; All of the time |
| Do you know where to go to get medical attention?                                                                                                                                         | None of the time; A little of the time; Some of the time; Most of the time; All of the time |
